# Supplementary material
Source: MDPI journal article supplement (https://www.mdpi.com/2075-4701/4/4/465)

**Supporting Information**

Figure S1. Depth of features produced in an acrylic sheet using a laser cutter in raster mode at different powers and speeds.


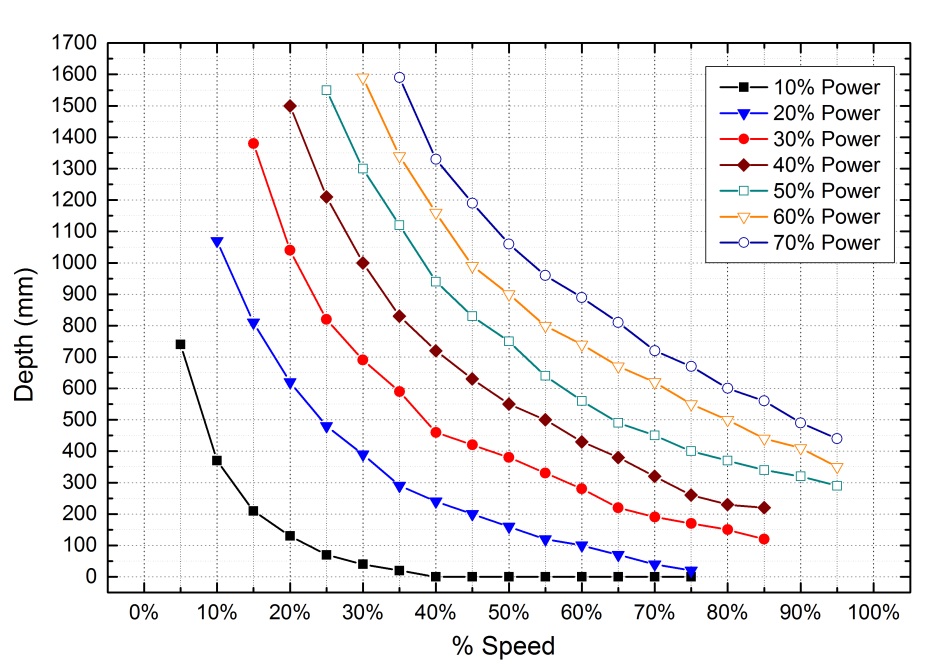

Supplement: s1 [file s1]
